# Supplementary material for: Automated development of an LC-MS/MS method for measuring multiple vitamin D metabolites using MUSCLE software
Source: Royal Society of Chemistry journal article supplement (doi:10.1039/c7ay00550d), 2017-01-01

**Supporting information Figure 1** Overlaid inlet gradients comparing; green line – manual developed method, purple line – optimised MUSCLE method, and black line – 25OHD3 MUSCLE method

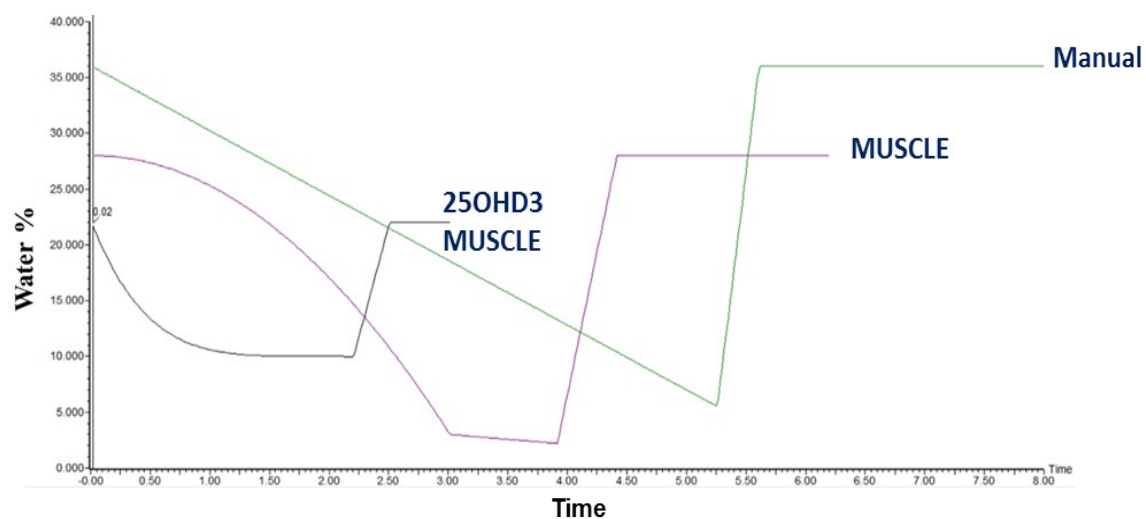

**Supporting information Figure 2** Post column infusion of 25OHD3 for a) manual developed method, b) MUSCLE method and c) 25OHD3 MUSCLE method. The concentration of infused 25OHD3 was 16 ng/mL

a)

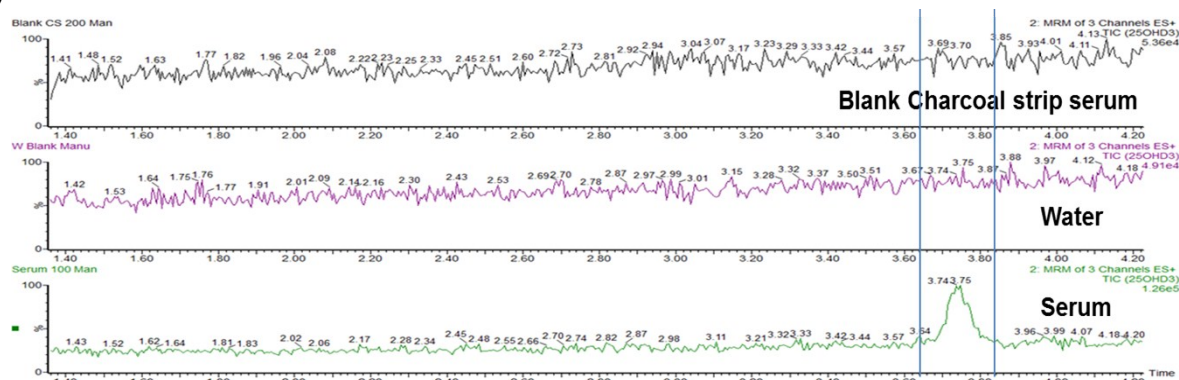

b)

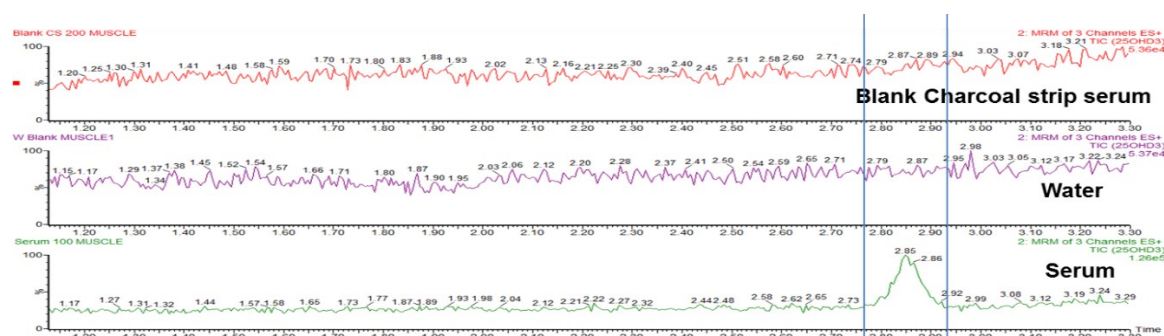

c)

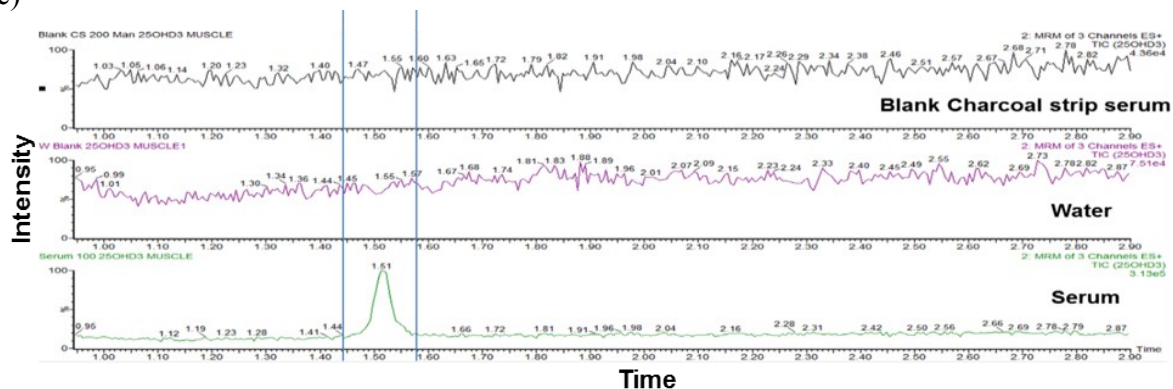

**Supporting information Figure 3** Bland Altman plots for a) 25OHD3 comparison with manual and MUSCLE methods, b) 3-Epi-25OHD3 comparison between manual and MUSCLE methods, c) 24,25(OH)<sub>2</sub>D3 with the MUSCLE method and manual method and d) 25OHD2 with the MUSCLE method and manual method, showing the mean bias (solid line)  $\pm$ SD (dotted lines)

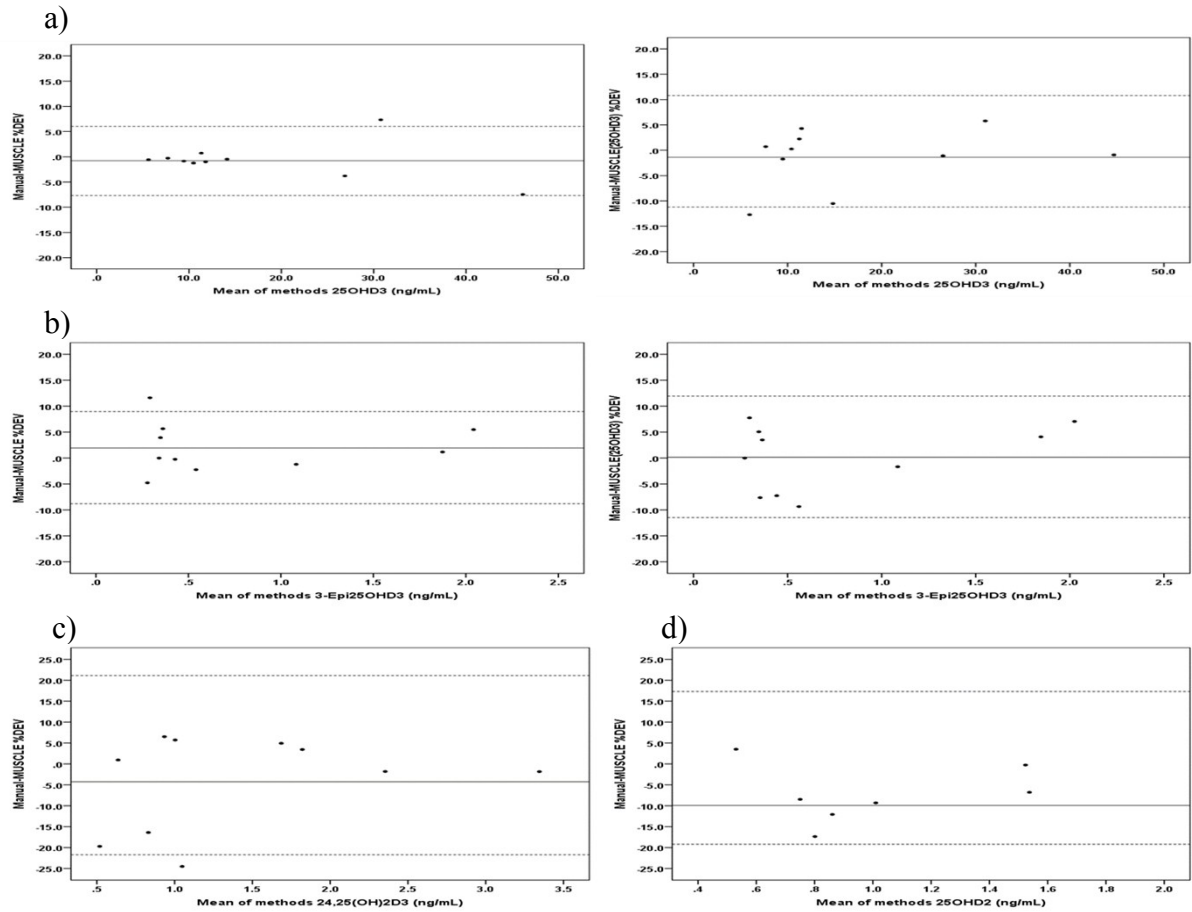

Supplement: c7ay00550d1.pdf [file c7ay00550d1.pdf]
